# Supplementary material for: Development, High-Throughput Profiling, and Biopanning of a Large Phage Display Single-Domain Antibody Library
Source: MDPI journal article supplement (doi:10.3390/ijms25094791), 2024-04-27
Supplement: s1 [file s1]

# Development, High-Throughput Profiling, and Biopanning of a Large Phage Display Single-Domain Antibody Library

Hee Eon Lee <sup>1,†</sup>, Ah Hyun Cho <sup>1,†</sup>, Jae Hyeon Hwang <sup>1</sup>, Ji Woong Kim <sup>1</sup>, Ha Rim Yang <sup>1</sup>, Taehoon Ryu <sup>2</sup>, Yushin Jung <sup>2</sup> and Sukmook Lee <sup>1,3,4\*</sup>

<sup>1</sup> Department of Biopharmaceutical Chemistry, Kookmin University, Seoul 02707, Republic of Korea

<sup>2</sup> ATG Lifetech Inc., Seoul 08507, Republic of Korea

<sup>3</sup> Department of Applied Chemistry, Kookmin University, Seoul 02707, Republic of Korea

<sup>4</sup> Antibody Research Institute, Kookmin University, Seoul 02707, Republic of Korea

\* Correspondence: lees2018@kookmin.ac.kr; Tel.: +82-2-910-6763

† These authors contributed equally to this work

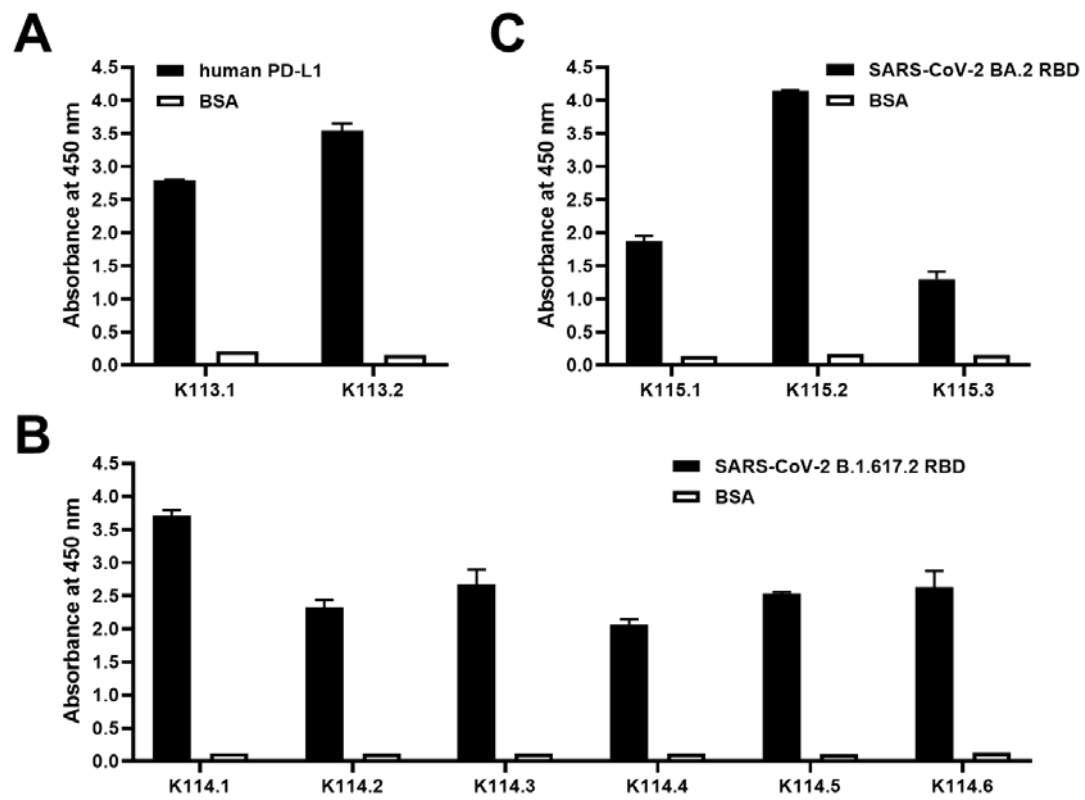

**Supplementary Figure S1. Specific binding of the selected VHHs to target antigens.** Phage ELISA was performed to verify the reactivity of the selected VHHs to human PD-L1 (A), SARS-CoV-2 BA.2 RBD (B), and SARS-CoV-2 B.1.617.2 RBD (C). Bovine serum albumin (BSA) was used as a negative control.

**Supplementary Table S1. Primers used for the construction of the single domain antibody library.**

| <b>Primer name</b>     | <b>5' to 3' Sequence</b>                         |
|------------------------|--------------------------------------------------|
| <b>Alp-Vh-F1 Sfi I</b> | ACTGTGGCCCAGGCGGCCCAGKTGCAGCTCGTGGAGTCNGGNGG     |
| <b>AlpVhh-R1 Sfi I</b> | ATGACTCGCGGCCGGCCTGGCCTCGTGGGGGTCTTCGCTGTGGTGCG  |
| <b>AlpVhh-R2 Sfi I</b> | ATGACTCGCGGCCGGCCTGGCCTCGCCTTGTGGTTTTGGTGTCTTGGG |

**Supplementary Table S2. The percentage of pairings between the 63 individual IGHV gene segments and the seven IGHJ gene families in the constructed library.**

|          | IGHJ1 | IGHJ2 | IGHJ3 | IGHJ4  | IGHJ5 | IGHJ6 | IGHJ7 |
|----------|-------|-------|-------|--------|-------|-------|-------|
| IGHV1-1  | 0.000 | 0.000 | 0.000 | 0.000  | 0.000 | 0.000 | 0.000 |
| IGHV3-1  | 0.000 | 0.000 | 0.000 | 0.000  | 0.000 | 0.000 | 0.000 |
| IGHV3-2  | 0.000 | 0.008 | 0.002 | 0.139  | 0.000 | 0.028 | 0.026 |
| IGHV3-3  | 0.000 | 0.028 | 0.015 | 5.149  | 0.002 | 0.455 | 0.195 |
| IGHV3S1  | 0.000 | 0.017 | 0.029 | 0.475  | 0.000 | 0.112 | 0.135 |
| IGHV3S10 | 0.000 | 0.000 | 0.000 | 0.000  | 0.000 | 0.000 | 0.000 |
| IGHV3S12 | 0.000 | 0.001 | 0.000 | 0.009  | 0.000 | 0.003 | 0.008 |
| IGHV3S14 | 0.000 | 0.000 | 0.000 | 0.000  | 0.000 | 0.000 | 0.000 |
| IGHV3S17 | 0.000 | 0.001 | 0.000 | 0.010  | 0.000 | 0.002 | 0.001 |
| IGHV3S18 | 0.000 | 0.000 | 0.000 | 0.000  | 0.000 | 0.000 | 0.000 |
| IGHV3S2  | 0.000 | 0.000 | 0.000 | 0.000  | 0.000 | 0.000 | 0.000 |
| IGHV3S20 | 0.000 | 0.000 | 0.000 | 0.000  | 0.000 | 0.000 | 0.000 |
| IGHV3S22 | 0.000 | 0.000 | 0.000 | 0.000  | 0.000 | 0.000 | 0.000 |
| IGHV3S24 | 0.000 | 0.000 | 0.000 | 0.000  | 0.000 | 0.000 | 0.000 |
| IGHV3S25 | 0.000 | 0.005 | 0.008 | 0.508  | 0.015 | 0.119 | 0.062 |
| IGHV3S26 | 0.000 | 0.000 | 0.000 | 0.000  | 0.000 | 0.000 | 0.000 |
| IGHV3S27 | 0.000 | 0.000 | 0.000 | 0.000  | 0.000 | 0.000 | 0.000 |
| IGHV3S28 | 0.000 | 0.002 | 0.006 | 0.429  | 0.001 | 0.061 | 0.050 |
| IGHV3S29 | 0.000 | 0.000 | 0.004 | 0.010  | 0.000 | 0.001 | 0.001 |
| IGHV3S30 | 0.000 | 0.007 | 0.028 | 1.420  | 0.003 | 0.628 | 0.141 |
| IGHV3S31 | 0.000 | 0.000 | 0.000 | 0.001  | 0.000 | 0.000 | 0.000 |
| IGHV3S32 | 0.000 | 0.000 | 0.000 | 0.001  | 0.000 | 0.000 | 0.000 |
| IGHV3S33 | 0.000 | 0.000 | 0.000 | 0.010  | 0.000 | 0.007 | 0.004 |
| IGHV3S34 | 0.000 | 0.001 | 0.000 | 0.025  | 0.000 | 0.031 | 0.001 |
| IGHV3S35 | 0.000 | 0.000 | 0.000 | 0.000  | 0.000 | 0.000 | 0.000 |
| IGHV3S36 | 0.000 | 0.000 | 0.000 | 0.000  | 0.000 | 0.000 | 0.000 |
| IGHV3S37 | 0.000 | 0.001 | 0.031 | 0.095  | 0.000 | 0.014 | 0.005 |
| IGHV3S38 | 0.000 | 0.000 | 0.000 | 0.000  | 0.000 | 0.000 | 0.000 |
| IGHV3S39 | 0.000 | 0.045 | 0.043 | 0.931  | 0.001 | 0.213 | 0.213 |
| IGHV3S40 | 0.000 | 0.000 | 0.000 | 0.007  | 0.000 | 0.002 | 0.000 |
| IGHV3S41 | 0.000 | 0.031 | 0.112 | 2.533  | 0.002 | 0.368 | 0.203 |
| IGHV3S42 | 0.000 | 0.000 | 0.000 | 0.000  | 0.000 | 0.000 | 0.000 |
| IGHV3S43 | 0.000 | 0.000 | 0.000 | 0.000  | 0.000 | 0.000 | 0.000 |
| IGHV3S44 | 0.000 | 0.000 | 0.000 | 0.000  | 0.000 | 0.000 | 0.000 |
| IGHV3S45 | 0.000 | 0.000 | 0.000 | 0.000  | 0.000 | 0.000 | 0.000 |
| IGHV3S5  | 0.000 | 0.000 | 0.000 | 0.000  | 0.000 | 0.000 | 0.000 |
| IGHV3S53 | 0.003 | 1.369 | 0.566 | 41.481 | 0.670 | 5.979 | 4.217 |
| IGHV3S54 | 0.000 | 0.017 | 0.007 | 0.052  | 0.005 | 0.016 | 0.003 |
| IGHV3S55 | 0.000 | 0.000 | 0.000 | 0.044  | 0.000 | 0.013 | 0.002 |
| IGHV3S56 | 0.000 | 0.000 | 0.000 | 0.074  | 0.000 | 0.012 | 0.000 |
| IGHV3S57 | 0.000 | 0.000 | 0.000 | 0.008  | 0.000 | 0.001 | 0.001 |
| IGHV3S58 | 0.000 | 0.000 | 0.000 | 0.007  | 0.000 | 0.000 | 0.000 |
| IGHV3S59 | 0.000 | 0.000 | 0.000 | 0.000  | 0.000 | 0.000 | 0.000 |
| IGHV3S6  | 0.000 | 0.000 | 0.000 | 0.046  | 0.000 | 0.004 | 0.014 |
| IGHV3S60 | 0.000 | 0.001 | 0.000 | 0.494  | 0.000 | 0.016 | 0.010 |
| IGHV3S61 | 0.000 | 0.177 | 0.108 | 5.684  | 0.004 | 2.363 | 1.259 |
| IGHV3S62 | 0.000 | 0.002 | 0.001 | 0.088  | 0.000 | 0.035 | 0.017 |
| IGHV3S63 | 0.000 | 0.001 | 0.001 | 0.107  | 0.000 | 0.016 | 0.022 |

|                 |       |       |       |        |       |       |       |
|-----------------|-------|-------|-------|--------|-------|-------|-------|
| <b>IGHV3S64</b> | 0.000 | 0.000 | 0.000 | 0.000  | 0.000 | 0.000 | 0.000 |
| <b>IGHV3S65</b> | 0.001 | 0.315 | 0.114 | 11.964 | 0.022 | 3.663 | 2.535 |
| <b>IGHV3S66</b> | 0.000 | 0.000 | 0.000 | 0.019  | 0.000 | 0.004 | 0.017 |
| <b>IGHV3S67</b> | 0.000 | 0.000 | 0.000 | 0.000  | 0.000 | 0.000 | 0.000 |
| <b>IGHV3S68</b> | 0.000 | 0.000 | 0.000 | 0.019  | 0.000 | 0.000 | 0.000 |
| <b>IGHV3S7</b>  | 0.000 | 0.001 | 0.001 | 0.036  | 0.000 | 0.006 | 0.004 |
| <b>IGHV3S8</b>  | 0.000 | 0.000 | 0.000 | 0.022  | 0.000 | 0.009 | 0.018 |
| <b>IGHV3S9</b>  | 0.000 | 0.001 | 0.000 | 0.083  | 0.000 | 0.091 | 0.012 |
| <b>IGHV4S1</b>  | 0.000 | 0.024 | 0.017 | 0.238  | 0.000 | 0.078 | 0.112 |
| <b>IGHV4S11</b> | 0.000 | 0.000 | 0.000 | 0.000  | 0.000 | 0.000 | 0.000 |
| <b>IGHV4S2</b>  | 0.000 | 0.000 | 0.000 | 0.000  | 0.000 | 0.000 | 0.000 |
| <b>IGHV4S5</b>  | 0.000 | 0.014 | 0.001 | 0.153  | 0.000 | 0.048 | 0.039 |
| <b>IGHV4S8</b>  | 0.000 | 0.000 | 0.000 | 0.000  | 0.000 | 0.000 | 0.000 |
| <b>IGHV4S9</b>  | 0.000 | 0.000 | 0.000 | 0.000  | 0.000 | 0.000 | 0.000 |

The percentages of all the pairing of germline V and J gene segments with a cut-off  $\geq 0.001$  are shown. Pairing with a of the gene segment cut-off  $< 0.001$  are expressed as 0.000.

Supplementary Table S3. The amino acid composition of CDR1, CDR2, and CDR3 in the constructed library, expressed as a percentage.

| Amino acid composition (%) |      |      |     |     |      |     |     |     |     |      |     |     |      |     |     |     |     |     |     |      |
|----------------------------|------|------|-----|-----|------|-----|-----|-----|-----|------|-----|-----|------|-----|-----|-----|-----|-----|-----|------|
|                            | G    | A    | L   | M   | F    | W   | K   | Q   | E   | S    | P   | V   | I    | C   | Y   | H   | R   | N   | D   | T    |
| CDR1                       | 13.0 | 6.7  | 5.1 | 0.8 | 12.5 | 0.4 | 0.7 | 0.5 | 1.3 | 13.3 | 1.2 | 3.2 | 7.7  | 0.1 | 9.5 | 1.3 | 4.3 | 4.8 | 5.0 | 8.7  |
| CDR2                       | 18.4 | 3.2  | 1.4 | 0.9 | 1.0  | 0.7 | 1.1 | 0.3 | 1.0 | 18.5 | 1.6 | 2.0 | 13.1 | 0.2 | 0.8 | 0.6 | 5.5 | 4.4 | 6.0 | 19.5 |
| CDR3                       | 9.7  | 10.6 | 5.4 | 1.3 | 2.8  | 2.1 | 1.8 | 1.9 | 4.0 | 7.3  | 4.5 | 5.0 | 2.5  | 1.9 | 9.9 | 2.0 | 8.3 | 5.8 | 8.0 | 5.4  |

**Supplementary Table S4. The amino acid frequency at each position in CDRs of the constructed library, expressed as a percentage.**

| <b>Position</b> | <b>G</b> | <b>A</b> | <b>L</b> | <b>M</b> | <b>F</b> | <b>W</b> | <b>K</b> | <b>Q</b> | <b>E</b> | <b>S</b> | <b>P</b> | <b>V</b> | <b>I</b> | <b>C</b> | <b>Y</b> | <b>H</b> | <b>R</b> | <b>N</b> | <b>D</b> | <b>T</b> |
|-----------------|----------|----------|----------|----------|----------|----------|----------|----------|----------|----------|----------|----------|----------|----------|----------|----------|----------|----------|----------|----------|
| <b>27</b>       | 85.38    | 2.06     | 0.18     | 0.03     | 0.01     | 0.01     | 0.61     | 0.23     | 3.16     | 0.55     | 0.14     | 0.83     | 0.15     | 0.01     | 0.00     | 0.00     | 5.24     | 0.03     | 0.48     | 0.89     |
| <b>28</b>       | 3.33     | 1.07     | 4.84     | 1.06     | 35.69    | 0.18     | 0.49     | 0.10     | 0.21     | 25.78    | 0.81     | 2.98     | 6.52     | 0.33     | 0.80     | 0.48     | 6.72     | 3.66     | 1.71     | 3.23     |
| <b>29</b>       | 1.18     | 3.98     | 2.22     | 1.29     | 2.43     | 0.05     | 0.28     | 0.14     | 0.10     | 9.88     | 2.20     | 3.07     | 23.53    | 0.02     | 2.12     | 0.21     | 2.33     | 4.83     | 1.94     | 38.20    |
| <b>30</b>       | 0.78     | 1.07     | 25.18    | 0.70     | 50.65    | 0.58     | 0.17     | 0.09     | 0.38     | 6.61     | 0.77     | 2.81     | 4.37     | 0.14     | 1.37     | 0.41     | 0.76     | 0.43     | 1.70     | 1.04     |
| <b>31</b>       | 1.81     | 1.63     | 4.05     | 0.09     | 21.21    | 0.67     | 0.37     | 0.49     | 0.51     | 15.80    | 0.86     | 1.15     | 4.39     | 0.18     | 0.63     | 0.25     | 1.09     | 27.85    | 3.47     | 13.51    |
| <b>32</b>       | 3.57     | 3.66     | 2.52     | 0.39     | 2.35     | 0.02     | 0.08     | 0.03     | 2.05     | 5.10     | 0.65     | 37.56    | 21.86    | 0.05     | 1.39     | 0.16     | 4.80     | 0.67     | 2.55     | 10.55    |
| <b>33</b>       | 0.34     | 0.75     | 1.86     | 0.38     | 0.14     | 0.02     | 0.16     | 0.07     | 0.12     | 4.13     | 0.42     | 1.05     | 4.81     | 0.02     | 2.95     | 1.20     | 0.88     | 58.66    | 0.84     | 21.21    |
| <b>34</b>       | 0.83     | 3.68     | 7.23     | 0.20     | 42.03    | 4.95     | 0.14     | 0.02     | 0.77     | 3.24     | 1.27     | 1.54     | 5.80     | 0.18     | 3.78     | 0.40     | 1.10     | 0.74     | 0.66     | 21.41    |
| <b>35</b>       | 6.90     | 1.86     | 0.30     | 0.53     | 0.76     | 0.12     | 2.02     | 0.23     | 4.64     | 41.82    | 0.44     | 1.41     | 0.82     | 0.15     | 0.63     | 1.04     | 9.21     | 5.98     | 18.47    | 2.68     |
| <b>36</b>       | 2.09     | 2.40     | 5.78     | 2.39     | 4.65     | 0.56     | 0.66     | 2.33     | 0.53     | 10.29    | 1.82     | 3.17     | 23.47    | 0.11     | 12.53    | 2.21     | 6.77     | 7.33     | 5.49     | 5.42     |
| <b>37</b>       | 1.45     | 1.77     | 1.86     | 0.19     | 3.92     | 0.78     | 0.91     | 0.58     | 0.58     | 5.32     | 0.59     | 1.37     | 0.82     | 0.17     | 57.30    | 3.74     | 1.31     | 12.49    | 2.90     | 1.96     |
| <b>38</b>       | 3.73     | 39.66    | 0.89     | 0.19     | 0.76     | 0.81     | 0.36     | 0.18     | 0.60     | 6.66     | 2.72     | 10.06    | 1.71     | 0.15     | 1.88     | 2.05     | 2.57     | 2.33     | 7.70     | 15.01    |
| <b>56</b>       | 0.04     | 0.79     | 3.38     | 3.03     | 2.02     | 0.05     | 0.33     | 0.13     | 0.08     | 1.69     | 0.04     | 3.94     | 81.84    | 0.08     | 0.09     | 0.12     | 0.73     | 0.25     | 0.06     | 1.31     |
| <b>57</b>       | 3.74     | 2.84     | 1.17     | 0.85     | 1.21     | 0.28     | 0.77     | 0.50     | 0.41     | 29.22    | 1.08     | 1.69     | 2.93     | 0.18     | 0.74     | 0.60     | 4.52     | 8.71     | 3.69     | 34.88    |
| <b>58</b>       | 7.21     | 4.32     | 1.27     | 0.63     | 2.14     | 4.24     | 1.94     | 0.51     | 1.16     | 39.77    | 2.48     | 1.15     | 1.67     | 0.26     | 1.18     | 0.89     | 10.21    | 8.02     | 2.37     | 8.57     |
| <b>59</b>       | 26.32    | 5.85     | 1.62     | 0.41     | 0.52     | 0.11     | 0.82     | 0.20     | 1.15     | 23.45    | 3.17     | 1.76     | 1.26     | 0.18     | 0.74     | 0.50     | 7.89     | 5.13     | 12.18    | 6.74     |
| <b>60</b>       | 14.30    | 16.39    | 1.25     | 0.43     | 1.39     | 0.19     | 0.38     | 0.59     | 0.92     | 19.78    | 1.01     | 1.36     | 2.08     | 0.12     | 0.23     | 0.79     | 4.01     | 2.99     | 17.79    | 14.00    |
| <b>61</b>       | 21.13    | 4.12     | 0.11     | 1.41     | 0.10     | 0.04     | 0.78     | 0.06     | 20.46    | 32.47    | 0.20     | 1.32     | 0.41     | 0.10     | 0.20     | 0.35     | 5.81     | 3.43     | 3.42     | 4.06     |
| <b>62</b>       | 53.02    | 3.05     | 0.18     | 0.19     | 0.22     | 0.02     | 0.13     | 0.14     | 2.59     | 4.52     | 0.22     | 1.12     | 0.26     | 0.22     | 0.47     | 0.28     | 1.44     | 2.10     | 27.52    | 2.31     |
| <b>63</b>       | 67.40    | 1.99     | 0.64     | 0.22     | 0.24     | 0.07     | 0.28     | 0.26     | 1.89     | 6.11     | 0.21     | 1.55     | 0.75     | 0.27     | 0.67     | 0.81     | 5.10     | 1.36     | 7.94     | 2.25     |
| <b>64</b>       | 5.52     | 2.38     | 1.20     | 1.22     | 0.96     | 0.34     | 1.95     | 0.43     | 0.90     | 34.16    | 0.61     | 3.79     | 4.91     | 0.10     | 2.01     | 1.13     | 9.60     | 8.52     | 4.21     | 16.08    |
| <b>65</b>       | 0.19     | 3.87     | 0.96     | 0.20     | 0.13     | 0.02     | 2.19     | 0.16     | 0.54     | 2.72     | 4.15     | 0.97     | 5.38     | 0.00     | 0.05     | 0.02     | 2.31     | 0.33     | 0.12     | 75.69    |
| <b>105</b>      | 1.50     | 35.60    | 0.81     | 0.15     | 0.26     | 0.06     | 3.26     | 0.36     | 0.28     | 2.55     | 0.07     | 1.58     | 0.21     | 0.10     | 3.96     | 3.87     | 1.45     | 41.51    | 0.39     | 2.03     |
| <b>106</b>      | 2.74     | 55.08    | 2.55     | 0.44     | 0.97     | 0.11     | 2.82     | 0.50     | 0.78     | 2.55     | 1.30     | 7.19     | 3.01     | 0.26     | 0.76     | 0.21     | 8.07     | 0.88     | 0.44     | 9.33     |
| <b>107</b>      | 9.02     | 6.20     | 3.69     | 0.71     | 1.07     | 1.92     | 3.35     | 4.52     | 8.14     | 3.03     | 4.54     | 6.15     | 1.93     | 0.28     | 2.10     | 3.75     | 14.77    | 3.41     | 18.62    | 2.79     |
| <b>108</b>      | 12.47    | 6.62     | 8.25     | 0.73     | 2.34     | 2.80     | 1.69     | 1.82     | 4.99     | 7.97     | 6.73     | 6.00     | 4.62     | 0.72     | 5.77     | 1.73     | 14.32    | 2.37     | 3.15     | 4.91     |
| <b>109</b>      | 12.51    | 4.93     | 6.55     | 1.21     | 2.93     | 2.98     | 1.44     | 2.71     | 2.64     | 10.49    | 5.48     | 6.22     | 3.50     | 0.61     | 5.89     | 1.31     | 13.97    | 2.05     | 4.96     | 7.62     |
| <b>110</b>      | 12.72    | 4.54     | 8.35     | 1.00     | 2.79     | 2.94     | 0.95     | 0.95     | 1.94     | 9.47     | 5.63     | 9.07     | 3.70     | 1.89     | 6.93     | 1.62     | 11.33    | 2.00     | 5.31     | 6.86     |
| <b>111</b>      | 12.49    | 4.20     | 7.15     | 1.06     | 2.84     | 3.63     | 2.13     | 1.73     | 1.85     | 9.66     | 5.76     | 6.09     | 3.17     | 4.16     | 8.09     | 1.59     | 8.27     | 3.77     | 5.18     | 7.18     |
| <b>111.1</b>    | 11.89    | 6.76     | 5.11     | 0.64     | 2.04     | 2.73     | 1.51     | 1.81     | 2.37     | 11.76    | 5.70     | 5.16     | 3.42     | 7.56     | 6.29     | 1.19     | 6.08     | 2.01     | 4.98     | 10.98    |
| <b>111.2</b>    | 12.15    | 4.74     | 6.60     | 0.98     | 1.95     | 2.24     | 1.28     | 1.35     | 1.95     | 10.33    | 5.29     | 7.10     | 3.31     | 7.43     | 6.71     | 1.24     | 8.18     | 2.05     | 8.65     | 6.48     |
| <b>H111.3</b>   | 9.86     | 4.73     | 11.05    | 1.80     | 2.27     | 4.17     | 1.89     | 2.80     | 2.29     | 11.36    | 3.78     | 8.41     | 2.16     | 5.55     | 8.84     | 0.91     | 4.51     | 2.70     | 4.18     | 6.73     |
| <b>111.4</b>    | 9.85     | 11.06    | 3.93     | 1.72     | 5.18     | 1.05     | 1.37     | 2.42     | 2.90     | 18.06    | 3.51     | 5.72     | 1.65     | 4.96     | 6.44     | 0.89     | 3.57     | 3.27     | 7.94     | 4.51     |
| <b>111.5</b>    | 4.93     | 5.70     | 3.43     | 3.39     | 2.91     | 1.01     | 1.28     | 22.63    | 3.28     | 6.27     | 3.13     | 9.28     | 2.33     | 10.41    | 6.60     | 0.69     | 4.62     | 0.65     | 4.45     | 3.03     |
| <b>111.6</b>    | 7.06     | 4.25     | 3.06     | 1.47     | 0.57     | 0.37     | 0.58     | 1.74     | 0.90     | 4.93     | 2.74     | 4.33     | 2.28     | 2.00     | 4.21     | 1.83     | 2.32     | 42.53    | 3.23     | 9.60     |
| <b>111.7</b>    | 76.84    | 2.31     | 1.34     | 0.56     | 0.16     | 0.14     | 0.17     | 2.30     | 0.32     | 1.10     | 0.95     | 1.79     | 1.35     | 1.13     | 0.87     | 0.28     | 3.03     | 0.57     | 3.62     | 1.17     |
| <b>111.8</b>    | 71.07    | 0.24     | 0.51     | 0.17     | 0.07     | 0.40     | 0.06     | 0.36     | 21.06    | 0.36     | 0.14     | 1.27     | 0.16     | 0.12     | 0.14     | 0.31     | 0.31     | 0.10     | 1.63     | 1.52     |
| <b>111.9</b>    | 4.20     | 4.05     | 0.15     | 2.40     | 3.60     | 0.30     | 1.65     | 47.90    | 0.30     | 4.35     | 4.50     | 18.02    | 0.45     | 0.15     | 0.60     | 0.45     | 4.50     | 0.15     | 0.90     | 1.35     |
| <b>112.9</b>    | 5.60     | 2.44     | 5.75     | 2.09     | 8.50     | 0.76     | 1.53     | 24.03    | 1.07     | 4.84     | 1.73     | 19.20    | 1.02     | 0.36     | 0.76     | 0.05     | 7.28     | 2.39     | 4.63     | 5.96     |

|              |       |       |       |      |       |      |      |      |       |       |       |      |      |       |       |      |       |      |       |      |
|--------------|-------|-------|-------|------|-------|------|------|------|-------|-------|-------|------|------|-------|-------|------|-------|------|-------|------|
| <b>112.8</b> | 2.05  | 1.45  | 0.60  | 0.16 | 0.33  | 0.05 | 0.06 | 0.66 | 0.43  | 0.75  | 0.58  | 0.85 | 0.16 | 0.44  | 0.54  | 0.77 | 87.07 | 0.09 | 0.52  | 2.44 |
| <b>112.7</b> | 4.84  | 3.47  | 53.66 | 1.03 | 0.93  | 3.29 | 0.78 | 0.81 | 0.47  | 5.51  | 1.08  | 2.41 | 8.23 | 3.16  | 2.96  | 0.58 | 1.55  | 0.79 | 2.22  | 2.25 |
| <b>112.6</b> | 30.54 | 13.08 | 3.99  | 2.13 | 1.39  | 0.70 | 1.15 | 1.46 | 1.43  | 4.60  | 11.34 | 4.06 | 0.88 | 5.45  | 4.03  | 1.58 | 1.90  | 0.89 | 5.40  | 4.02 |
| <b>112.5</b> | 4.71  | 4.13  | 15.58 | 4.28 | 1.28  | 1.17 | 1.10 | 3.15 | 1.95  | 7.74  | 4.36  | 8.11 | 3.53 | 5.20  | 5.56  | 0.70 | 5.06  | 8.74 | 3.94  | 9.71 |
| <b>112.4</b> | 13.00 | 4.51  | 6.10  | 3.32 | 1.16  | 2.82 | 1.04 | 1.61 | 7.09  | 6.80  | 3.45  | 7.17 | 1.68 | 10.46 | 6.30  | 1.33 | 4.10  | 5.08 | 5.05  | 7.94 |
| <b>112.3</b> | 9.07  | 5.90  | 8.06  | 3.83 | 2.02  | 5.55 | 1.19 | 1.50 | 2.32  | 8.12  | 7.02  | 5.10 | 3.70 | 9.73  | 8.60  | 2.01 | 4.02  | 1.89 | 3.68  | 6.69 |
| <b>112.2</b> | 11.38 | 5.81  | 11.93 | 1.65 | 2.35  | 3.24 | 3.04 | 1.08 | 4.70  | 8.15  | 6.26  | 4.02 | 2.95 | 8.42  | 4.76  | 1.50 | 6.75  | 2.34 | 4.12  | 5.56 |
| <b>112.1</b> | 9.62  | 5.44  | 9.14  | 2.99 | 2.17  | 2.54 | 1.72 | 2.51 | 3.78  | 8.82  | 7.44  | 4.72 | 2.25 | 2.50  | 5.34  | 1.90 | 8.22  | 3.23 | 7.54  | 8.12 |
| <b>112</b>   | 12.86 | 8.51  | 6.07  | 1.57 | 2.38  | 3.14 | 1.75 | 2.03 | 4.28  | 8.79  | 12.19 | 4.41 | 2.93 | 1.26  | 6.05  | 1.99 | 7.55  | 2.28 | 4.55  | 5.41 |
| <b>113</b>   | 14.71 | 5.91  | 4.37  | 0.83 | 1.87  | 3.95 | 1.81 | 1.78 | 3.94  | 9.49  | 4.07  | 3.82 | 2.29 | 0.34  | 9.99  | 2.54 | 11.16 | 3.59 | 7.45  | 6.09 |
| <b>114</b>   | 17.38 | 5.96  | 6.58  | 1.15 | 3.00  | 1.45 | 1.78 | 4.30 | 11.61 | 5.30  | 6.21  | 2.96 | 2.55 | 0.12  | 2.94  | 1.50 | 8.47  | 2.50 | 9.57  | 4.66 |
| <b>115</b>   | 5.10  | 2.65  | 5.40  | 4.78 | 12.04 | 1.73 | 1.61 | 1.59 | 2.83  | 3.96  | 3.00  | 5.00 | 1.86 | 0.20  | 25.85 | 1.31 | 11.80 | 3.20 | 2.96  | 3.12 |
| <b>116</b>   | 11.15 | 3.06  | 1.13  | 0.35 | 0.39  | 0.51 | 0.85 | 1.13 | 9.55  | 4.20  | 1.52  | 2.27 | 0.91 | 0.15  | 1.20  | 2.24 | 2.52  | 9.99 | 43.08 | 3.82 |
| <b>117</b>   | 0.54  | 3.15  | 2.75  | 0.15 | 5.87  | 0.61 | 0.10 | 0.19 | 0.17  | 12.86 | 0.95  | 3.50 | 1.37 | 0.51  | 56.67 | 3.59 | 0.67  | 1.99 | 2.13  | 2.22 |

The amino acid frequency at each position in CDRs with a cut-off  $\geq 0.01$  are represented. Amino acid frequencies with a cut-off  $< 0.01$  are expressed as 0.00.

Supplementary Table S5. Length of complementarity-determining regions (CDR1, CDR2, CDR3) in selected VHHs.

| Antigen                     | Antibody (VHH) | Length |      |      |
|-----------------------------|----------------|--------|------|------|
|                             |                | CDR1   | CDR2 | CDR3 |
| Human PD-L1                 | K113.1         | 8      | 8    | 8    |
|                             | K113.2         | 8      | 8    | 8    |
| SARS-CoV-2<br>B.1.617.2 RBD | K114.1         | 8      | 8    | 19   |
|                             | K114.2         | 8      | 8    | 19   |
|                             | K114.3         | 8      | 8    | 9    |
|                             | K114.4         | 8      | 8    | 9    |
|                             | K114.5         | 8      | 8    | 13   |
|                             | K114.6         | 8      | 8    | 9    |
| SARS-CoV-2<br>BA.2 RBD      | K115.1         | 8      | 8    | 12   |
|                             | K115.2         | 8      | 8    | 17   |
|                             | K115.3         | 8      | 7    | 12   |

Supplementary Table S6. Primers used for amplification of VHH sequence.

| Primer name | 5' to 3' Sequence  |
|-------------|--------------------|
| Forward     | TGGCTGGTTTCGCTACC  |
| Reverse     | TGATGGTGATGGTGCTGG |

**Supplementary Table S7. Index adapters used for enrichment adapter-ligated product.**

| <b>Index Adapter</b> | <b>5' to 3' Sequence</b>                                               |
|----------------------|------------------------------------------------------------------------|
| <b>Index 1 (i7)</b>  | GATCGGAAGAGCACACGTCTGAACTCCAGTCACNNNNNNNNNATCTCGTATGCCGTC<br>TTCTGCTTG |
| <b>Index 2 (i5)</b>  | AATGATACGGCGACCACCGAGATCTACACNNNNNNNNNACACTCTTCCCTACACG                |
